# Supplementary material for: ONC212 is a Novel Mitocan Acting Synergistically with Glycolysis Inhibition in Pancreatic Cancer
Source: Oxford University Press journal article supplement (doi:10.1158/1535-7163.mct-20-0962), 2021-06-17
Supplement: 15357163mct200962-sup-255316_2_supp_7038754_qr7yd2.docx [file 15357163mct200962-sup-255316_2_supp_7038754_qr7yd2.docx]

Supplementary Table S2

Supplementary Table S2: differential blood cell count of mice treated with ONC212, 2-DG, or the combination of both agents.

|  | **ONC212** | **2-DG** | **Combination** | **Reference range** |
| --- | --- | --- | --- | --- |
| Hb g/dl | 12.8 | 12.8 | 12.2 | 12.8-17.7 |
| PLT x103/mmc | 811 | 624 | 963 | 691-1400 |
| WBC x103/mmc | 4.59 | 2.82 | 1.33 | 2.9-15.8 |
| Neu x103/mmc | 2.81 | 1.80 | 0.77 | 1.02-5.01 |
| Ly x103/mmc | 1.2 | 0.79 | 0.44 | 1.20-10.87 |
| Mono x103/mmc | 0.18 | 0.03 | 0.03 | 0.11-0.86 |
| Eo x103/mmc | 0.23 | 0.09 | 0.05 | 0.01-0.53 |
| Baso x103/mmc | 0.04 | 0.02 | 0.04 | 0.00-0.21 |
