# Supplementary material for: ONC212 is a Novel Mitocan Acting Synergistically with Glycolysis Inhibition in Pancreatic Cancer
Source: Oxford University Press journal article supplement (doi:10.1158/1535-7163.mct-20-0962), 2021-06-17
Supplement: 15357163mct200962-sup-255316_2_supp_7038755_qr71d2.docx [file 15357163mct200962-sup-255316_2_supp_7038755_qr71d2.docx]

Supplementary Table S3

Supplementary Table S3: blood chemistry results of mice treated with ONC212 or the combination of ONC212 and 2-DG

|  | **ONC212** | **Combination** | **Reference range** |
| --- | --- | --- | --- |
| Creatinine mg/dl | 0.2 | 0.2 | 0.3-0.5 |
| ALP mmol/L | 61 | 73 | 57-160 |
| ALT U/L | 25 | 58 | 35-90 |
| AST U/L | 121 | 148 | 63-253 |
| Total bilirubin mg/dl | 0.2 | 0.1 | 0.2-0.6 |
| LDH U/L | 607 | 755 | 1900-2700 |
| CPK U/L | 404 | 299 | 620-920 |
| GGT U/L | 1 | 1 | 2.4-3.2 |
| Total protein g/dl | 5.3 | 4.7 | 5.3-6.8 |
| Albumin g/dl | 3 | 2.7 | 3.2-4.3 |
| Calcium mg/dl | 9.3 | 8.4 | 9.6-11.3 |
| Phosphate mg/dl | 8.9 | 9.5 | 7-13.2 |
| Cholesterol mg/dl | 152 | 115 | 87-198 |
| Triglycerides mg/dl | 123 | 231 | 101-403 |
| Amilase U/L | 402 | 379 | 5000-8000 |
| Lipase U/L | 26 | 36 | 700-1100 |
